# Supplementary material
Source: PubMed Central journal article supplement (PMC7226297)

## Supplementary Online Content

Zhao EE, Dornhoffer JR, Loftus C. Association of patient-related factors with adult cochlear implant speech recognition outcomes: a meta-analysis. Published online May 14, 2020. *JAMA Otolaryngol Head Neck Surg*. doi:10.1001/jamaoto.2020.0662

**eFigure.** Duration of hearing loss and word recognition in quiet

This supplementary material has been provided by the authors to give readers additional information about their work.

# Duration of Hearing Loss and Word Recognition in Quiet

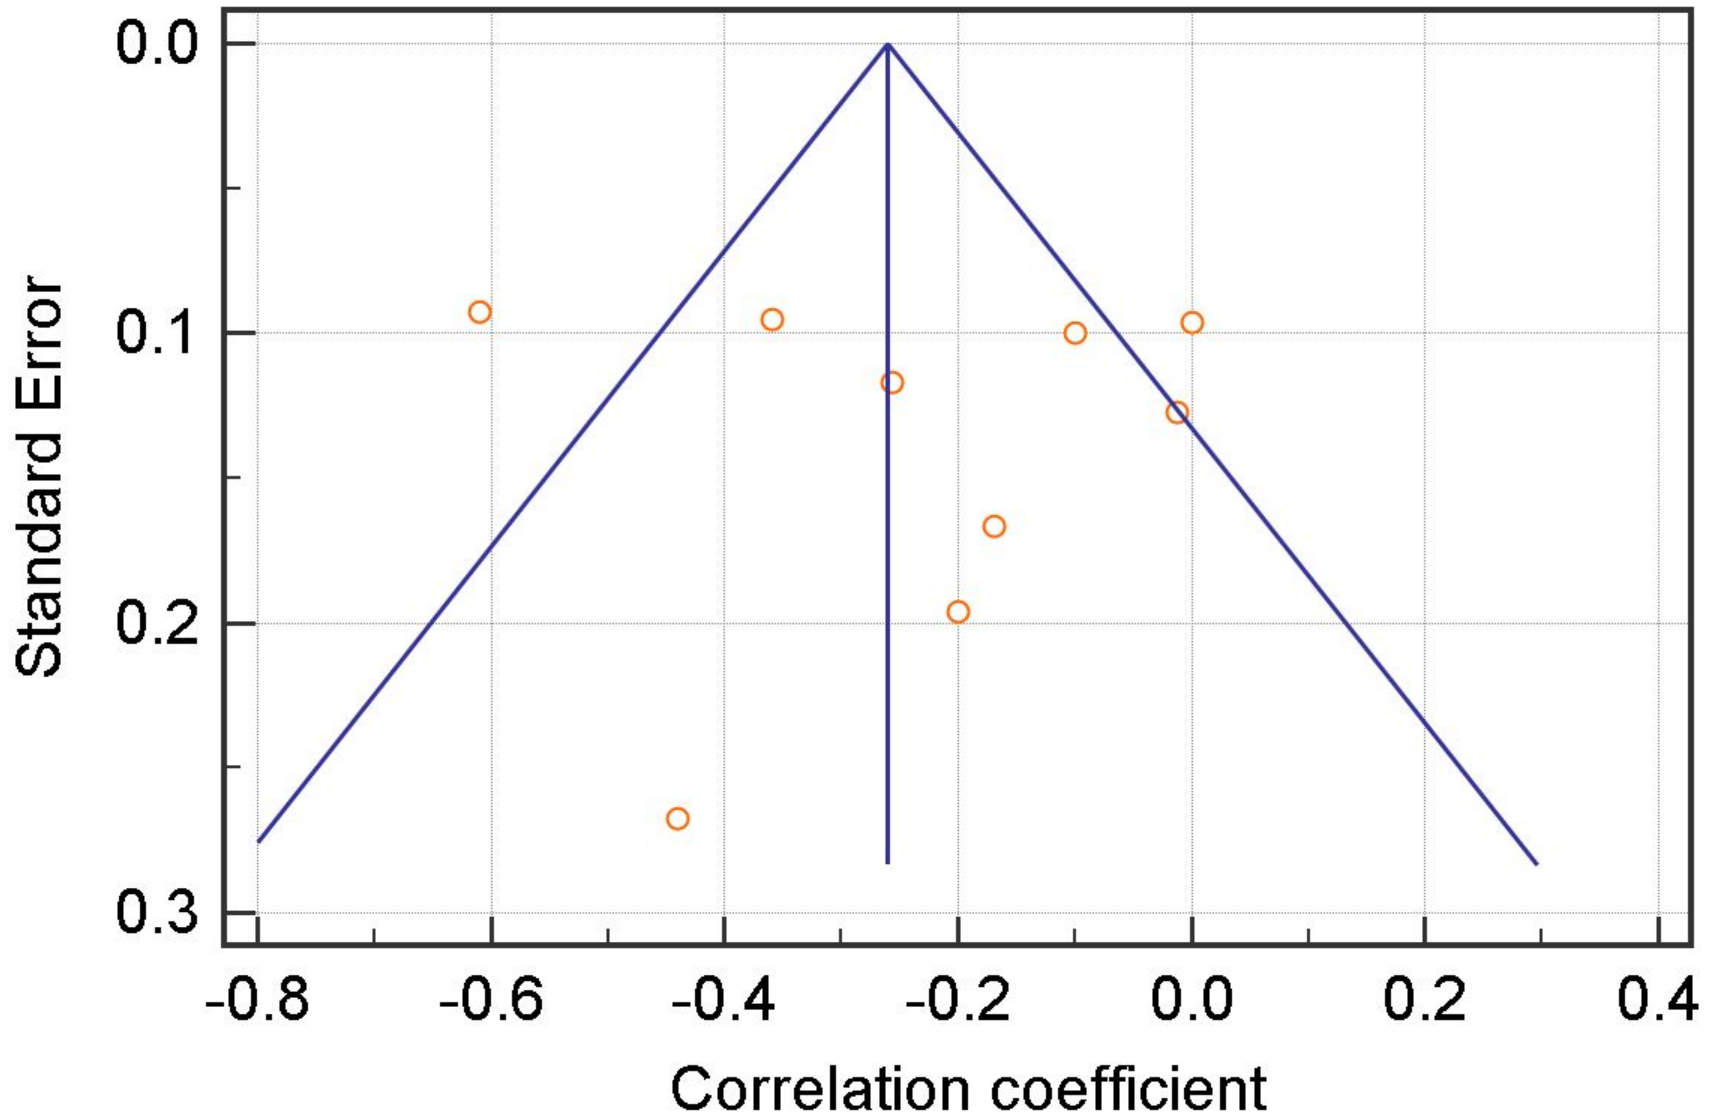

Supplement: jamaotolaryngolheadnecksurg-146-613-s001.pdf [file jamaotolaryngolheadnecksurg-146-613-s001.pdf]
